# Supplementary material for: Novel ratiometric turn-on fluorescent probe for selective sensing of cyanide ions, effect of substitution and bio-imaging studies
Source: Royal Society of Chemistry journal article supplement (doi:10.1039/c5ra27517b), 2016-01-01
Supplement: c5ra27517b1.pdf [file c5ra27517b1.pdf]

## Novel Ratiometric Turn-on Fluorescent Probe for Selective Sensing of Cyanide ions, Effect of substitution and Bio-imaging Studies

Gopal Balamurugan<sup>a</sup>, Parthiban Venkatesan<sup>b</sup>, Shu Pao Wu<sup>b</sup>, Sivan Velmathi<sup>a,\*</sup>

<sup>a</sup>Organic and polymer synthesis Laboratory, Department of Chemistry, National Institute of Technology, Tiruchirappalli-620015, India.

<sup>b</sup>Department of Applied Chemistry, National Chiao Tung University, Hsinchu, Taiwan

\*Corresponding Author [velmathis@nitt.edu](mailto:velmathis@nitt.edu), [svelmathi@hotmail.com](mailto:svelmathi@hotmail.com)

### Supporting Information

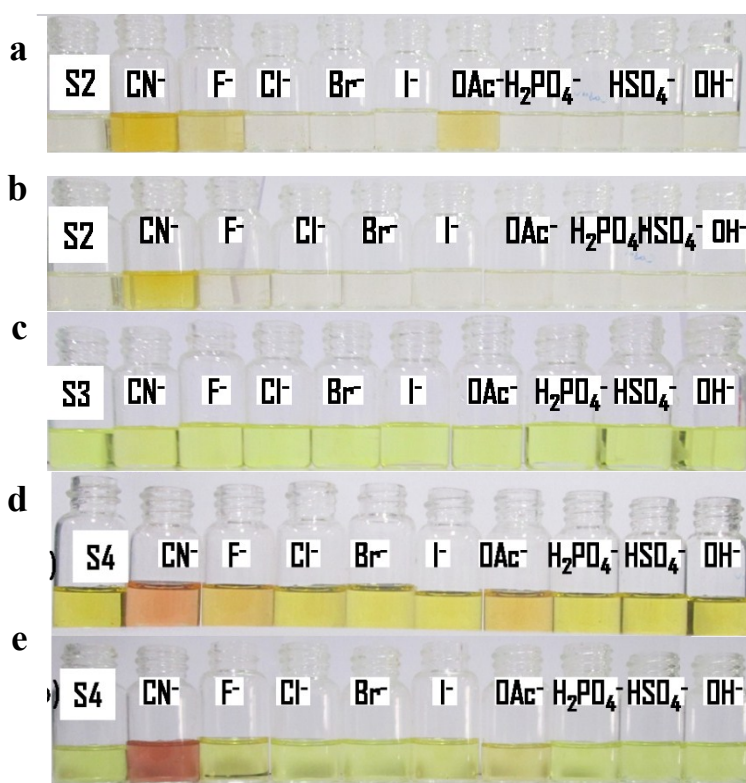

**Fig. A1** (a) Naked eye sensing of **S2** ( $5 \times 10^{-5}$  M in ACN) with 200  $\mu$ L of anions ( $1.5 \times 10^{-3}$  M in ACN) (b) Naked eye sensing of **S2** ( $5 \times 10^{-5}$  M in 3% aq. ACN) with 200  $\mu$ L of anions ( $1.5 \times 10^{-3}$  M in H<sub>2</sub>O) (c) Naked eye sensing of **S3** ( $5 \times 10^{-5}$  M in ACN) with 200  $\mu$ L of anions ( $1.5 \times 10^{-3}$  M in ACN) (d) Naked eye sensing of **S4** ( $5 \times 10^{-5}$  M in ACN) with 200  $\mu$ L of anions ( $1.5 \times 10^{-3}$  M in ACN) (e) Naked eye sensing of **S4** ( $5 \times 10^{-5}$  M in 3% aq. ACN) with 200  $\mu$ L of anions ( $1.5 \times 10^{-3}$  M in H<sub>2</sub>O)

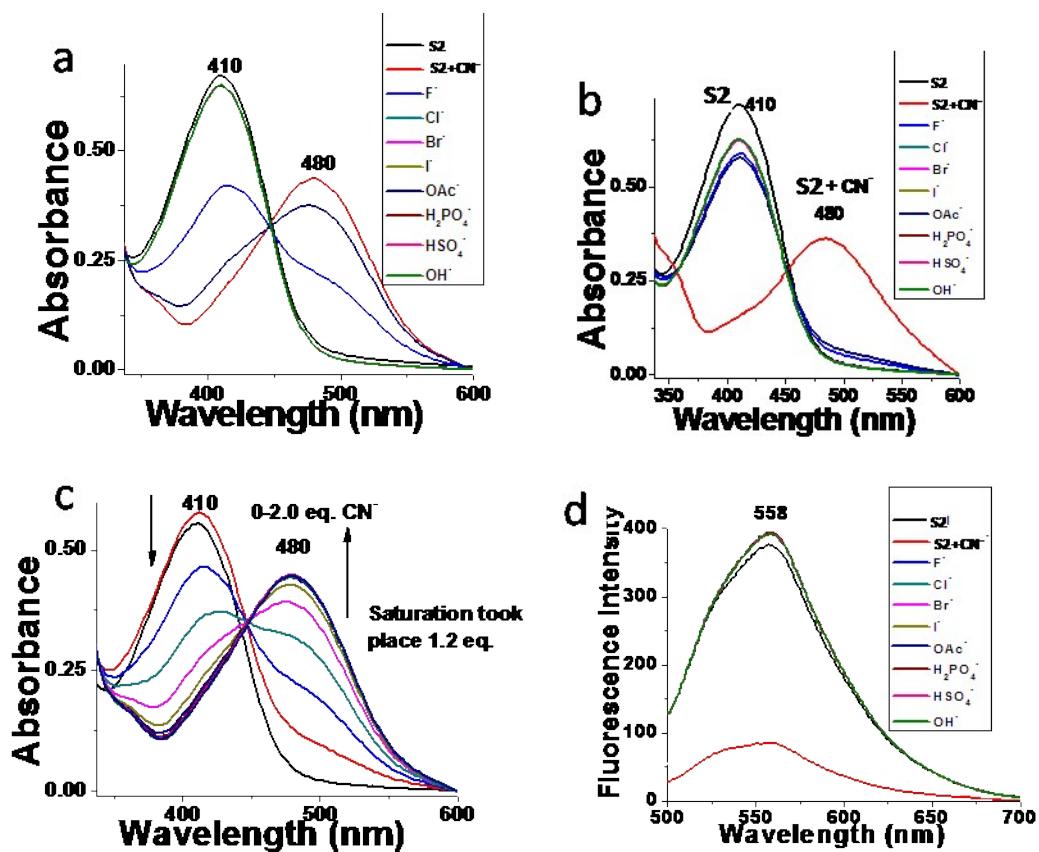

**Fig. A2** (a) UV-vis spectral studies of S2 ( $5 \times 10^{-5}$  M in ACN) with 200  $\mu$ L of anions ( $1.5 \times 10^{-3}$  M in ACN) (b) UV-vis spectral studies of S2 ( $5 \times 10^{-5}$  M in 97:3 ACN: water) with 200  $\mu$ L of anions ( $1.5 \times 10^{-3}$  M in H<sub>2</sub>O) (c) Incremental addition of CN<sup>-</sup> to S2 (d) Photoluminescence studies of S2 ( $5 \times 10^{-5}$  M in 97:3 ACN: water) with 200  $\mu$ L of anions ( $1.5 \times 10^{-3}$  M in H<sub>2</sub>O)

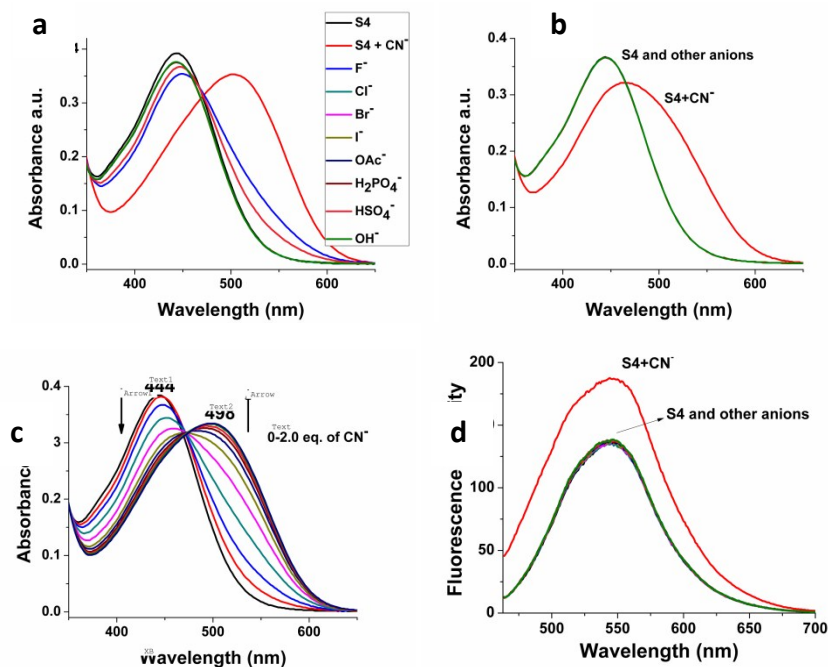

**Fig. A3** (a) UV-vis spectral studies of **S4** ( $5 \times 10^{-5}$  M in ACN) with 200 μL of anions ( $1.5 \times 10^{-3}$  M in ACN) (b) UV-vis spectral studies of **S4** ( $5 \times 10^{-5}$  M in 97:3 ACN: water) with 200 μL of anions ( $1.5 \times 10^{-3}$  M in H<sub>2</sub>O) (c) Incremental addition of CN<sup>-</sup> to **S4** (d) Photoluminescence studies of **S4** ( $5 \times 10^{-5}$  M in 97:3 ACN: water) with 200 μL of anions ( $1.5 \times 10^{-3}$  M in H<sub>2</sub>O)
